# Supplementary material
Source: MDPI journal article supplement (https://www.mdpi.com/2073-4441/15/7/1356)
Supplement: s1 [file s1]

# Life-history traits and acclimation ability of a copepod species from the dripping waters of the Corchia Cave (Apuan Alps, Tuscany, Italy)

Di Lorenzo Tiziana <sup>1,2,3\*</sup>, Galassi Diana Maria Paola <sup>4</sup>, Tabilio Di Camillo Agostina <sup>1,4</sup>, Pop Maria-Mirabela <sup>3</sup>, Iepure Sanda <sup>3,5</sup> and Piccini Leonardo <sup>6</sup>

<sup>1</sup> Research Institute on Terrestrial Ecosystems of the National Research Council of Italy (IRET CNR), Florence, Italy

<sup>2</sup> NBFC (National Biodiversity Future Center), Palermo 90133, Italy

<sup>3</sup> “Emil Racovita” Institute of Speleology, Cluj-Napoca, Romania

<sup>4</sup> Department of Life, Health and Environmental Sciences, University of L’Aquila, L’Aquila, Italy

<sup>5</sup> Department of Taxonomy and Ecology, University Babes – Bolyai, Cluj Napoca, Romania

<sup>6</sup> Department of Earth Sciences, University of Florence, Florence, Italy

\* Correspondence: tiziana.dilorenzo@cnr.it

Table S1. Oxygen consumption rates in ng O<sub>2</sub>/mg DW × h of female individuals of *Moraria* sp. at four acclimation temperatures. T: temperature in °C; L: body length in mm; W: body width in mm; BV: biovolume in nL; FW: fresh weight in µg; DW: dry weight in µg. ID indicates the individuals of *Moraria* sp. used in this study.

| ID | T    | L    | W     | BV  | FW  | DW  | ng O <sub>2</sub> /mg DW × h |
|----|------|------|-------|-----|-----|-----|------------------------------|
| A1 | 8.0  | 0.55 | 0.138 | 5.1 | 5.6 | 1.4 | 1789                         |
| A2 | 8.0  | 0.58 | 0.142 | 5.7 | 6.3 | 1.6 | 140                          |
| B2 | 8.0  | 0.54 | 0.142 | 5.3 | 5.9 | 1.5 | 216                          |
| C2 | 8.0  | 0.55 | 0.138 | 5.1 | 5.6 | 1.4 | 598                          |
| A3 | 8.0  | 0.55 | 0.138 | 5.1 | 5.6 | 1.4 | 1789                         |
| B3 | 8.0  | 0.55 | 0.145 | 5.7 | 6.2 | 1.6 | 203                          |
| B4 | 8.0  | 0.54 | 0.145 | 5.6 | 6.1 | 1.5 | 427                          |
| D4 | 8.0  | 0.54 | 0.127 | 4.3 | 4.7 | 1.2 | 1374                         |
| B5 | 8.0  | 0.58 | 0.127 | 4.6 | 5.0 | 1.3 | 1774                         |
| C5 | 8.0  | 0.53 | 0.145 | 5.5 | 6.0 | 1.5 | 818                          |
| A1 | 9.5  | 0.56 | 0.142 | 5.5 | 6.1 | 1.5 | 1378                         |
| B1 | 9.5  | 0.56 | 0.145 | 5.8 | 6.3 | 1.6 | 1200                         |
| C1 | 9.5  | 0.55 | 0.138 | 5.1 | 5.6 | 1.4 | 1621                         |
| D1 | 9.5  | 0.55 | 0.127 | 4.3 | 4.8 | 1.2 | 1553                         |
| A2 | 9.5  | 0.55 | 0.127 | 4.3 | 4.8 | 1.2 | 1432                         |
| B2 | 9.5  | 0.55 | 0.127 | 4.3 | 4.8 | 1.2 | 1914                         |
| C2 | 9.5  | 0.56 | 0.140 | 5.4 | 5.9 | 1.5 | 1222                         |
| D2 | 9.5  | 0.54 | 0.145 | 5.6 | 6.1 | 1.5 | 1464                         |
| A3 | 9.5  | 0.54 | 0.142 | 5.3 | 5.9 | 1.5 | 1330                         |
| B3 | 9.5  | 0.58 | 0.142 | 5.7 | 6.3 | 1.6 | 1208                         |
| C3 | 9.5  | 0.53 | 0.145 | 5.5 | 6.0 | 1.5 | 1396                         |
| D3 | 9.5  | 0.55 | 0.145 | 5.7 | 6.2 | 1.6 | 1068                         |
| A4 | 9.5  | 0.55 | 0.145 | 5.7 | 6.2 | 1.6 | 1099                         |
| B4 | 9.5  | 0.55 | 0.149 | 6.0 | 6.6 | 1.6 | 1566                         |
| C4 | 9.5  | 0.55 | 0.138 | 5.1 | 5.6 | 1.4 | 1451                         |
| D4 | 9.5  | 0.54 | 0.145 | 5.6 | 6.1 | 1.5 | 1370                         |
| A5 | 9.5  | 0.53 | 0.140 | 5.1 | 5.6 | 1.4 | 1600                         |
| B5 | 9.5  | 0.53 | 0.142 | 5.2 | 5.8 | 1.4 | 1289                         |
| C5 | 9.5  | 0.58 | 0.142 | 5.7 | 6.3 | 1.6 | 1513                         |
| D5 | 9.5  | 0.54 | 0.142 | 5.3 | 5.9 | 1.5 | 1167                         |
| A6 | 9.5  | 0.58 | 0.145 | 6.0 | 6.6 | 1.6 | 1305                         |
| D1 | 11.0 | 0.55 | 0.127 | 4.3 | 4.8 | 1.2 | 1807                         |
| C2 | 11.0 | 0.56 | 0.138 | 5.2 | 5.7 | 1.4 | 104                          |
| A3 | 11.0 | 0.56 | 0.145 | 5.8 | 6.3 | 1.6 | 2301                         |
| C3 | 11.0 | 0.56 | 0.145 | 5.8 | 6.3 | 1.6 | 668                          |
| A4 | 11.0 | 0.56 | 0.127 | 4.4 | 4.9 | 1.2 | 3779                         |
| A5 | 11.0 | 0.55 | 0.140 | 5.3 | 5.8 | 1.5 | 1583                         |
| B5 | 11.0 | 0.55 | 0.145 | 5.7 | 6.2 | 1.6 | 2618                         |
| C5 | 11.0 | 0.55 | 0.142 | 5.4 | 6.0 | 1.5 | 3051                         |
| A1 | 12.5 | 0.54 | 0.142 | 5.3 | 5.9 | 1.5 | 4286                         |
| A2 | 12.5 | 0.56 | 0.145 | 5.8 | 6.3 | 1.6 | 3449                         |
| B2 | 12.5 | 0.56 | 0.145 | 5.8 | 6.3 | 1.6 | 968                          |
| C2 | 12.5 | 0.58 | 0.138 | 5.4 | 6.0 | 1.5 | 1096                         |
| D2 | 12.5 | 0.53 | 0.127 | 4.2 | 4.6 | 1.2 | 3126                         |
| C3 | 12.5 | 0.56 | 0.127 | 4.4 | 4.9 | 1.2 | 3826                         |
| D3 | 12.5 | 0.54 | 0.127 | 4.3 | 4.7 | 1.2 | 1104                         |
| B1 | 12.5 | 0.55 | 0.145 | 5.7 | 6.2 | 1.6 | 208                          |
| C1 | 12.5 | 0.55 | 0.140 | 5.3 | 5.8 | 1.5 | 1875                         |
| B2 | 12.5 | 0.55 | 0.142 | 5.4 | 6.0 | 1.5 | 1116                         |
| B3 | 12.5 | 0.53 | 0.140 | 5.1 | 5.6 | 1.4 | 1741                         |
| A4 | 12.5 | 0.55 | 0.127 | 4.3 | 4.8 | 1.2 | 2440                         |
| D4 | 12.5 | 0.55 | 0.138 | 5.1 | 5.6 | 1.4 | 2610                         |
| C5 | 12.5 | 0.55 | 0.127 | 4.3 | 4.8 | 1.2 | 994                          |
| D5 | 12.5 | 0.53 | 0.138 | 4.9 | 5.4 | 1.4 | 274                          |

Table S2. PERMANOVA results based on Euclidean distances of oxygen consumption rates  $\text{ng O}_2/\text{mg DW} \times \text{h}$  of female individuals of *Moraria* sp. at four acclimation temperatures (T: 8.0, 9.5, 11.0, 12.5 °C).

| Source | df | SS                   | MS                   | Pseudo-F | P(perm) | perms |
|--------|----|----------------------|----------------------|----------|---------|-------|
| T      | 3  | $8.4438 \times 10^6$ | $2.8146 \times 10^6$ | 3.6325   | 0.016   | 999   |
| Res    | 50 | $3.8742 \times 10^7$ | $7.7484 \times 10^5$ |          |         |       |
| Total  | 53 | $4.7186 \times 10^7$ |                      |          |         |       |
